# Supplementary material for: Metabolome Alterations Linking Sugar-Sweetened Beverage Intake with Dyslipidemia in Youth: The Exploring Perinatal Outcomes among CHildren (EPOCH) Study
Source: MDPI journal article supplement (doi:10.3390/metabo12060559), 2022-06-17
Supplement: s1 [file s1]

## Online Supplementary Materials

### Title:

Metabolome Alterations Linking Sugar Sweetened Beverage (SSB) Intake with Dyslipidemia in Youth: The Exploring Perinatal Outcomes among Children (EPOCH) Study

### Authors & Affiliations:

Catherine C. Cohen<sup>1,2</sup>; Dana Dabelea<sup>1,2,3</sup>; Katerina Kechris<sup>4</sup>; Gregory Michelotti<sup>5</sup>; Lu Tang<sup>6</sup>; Kartik Shankar<sup>1,2</sup>; Michael I. Goran<sup>7</sup>; Wei Perng<sup>2,3,8</sup>.

<sup>1</sup> Department of Pediatrics, School of Medicine, University of Colorado Anschutz Medical Campus, Aurora, CO, USA.

<sup>2</sup> Lifecourse Epidemiology of Adiposity and Diabetes (LEAD) Center, University of Colorado Denver Anschutz Medical Campus, Aurora CO, USA.

<sup>3</sup> Department of Epidemiology, Colorado School of Public Health, University of Colorado Anschutz Medical Campus, Aurora, CO, USA.

<sup>4</sup> Department of Biostatistics and Informatics, Colorado School of Public Health, University of Colorado Anschutz Medical Campus, Aurora, CO, USA.

<sup>5</sup> Metabolon, Inc., Chapel Hill, NC, USA.

<sup>6</sup> Department of Biostatistics, University of Pittsburgh School of Public Health, Pittsburgh, PA, USA.

<sup>7</sup> Department of Population and Public Health Sciences, Keck School of Medicine, University of Southern California, Los Angeles, CA, USA.

<sup>8</sup> Department of Nutritional Sciences, University of Michigan School of Public Health, Ann Arbor, MI, USA.

### Corresponding Author:

Catherine Cioffi Cohen, PhD, RDN; Catherine.Cioffi@cuanschutz.edu.

**A. Dicarboxylated Fatty Acids:**

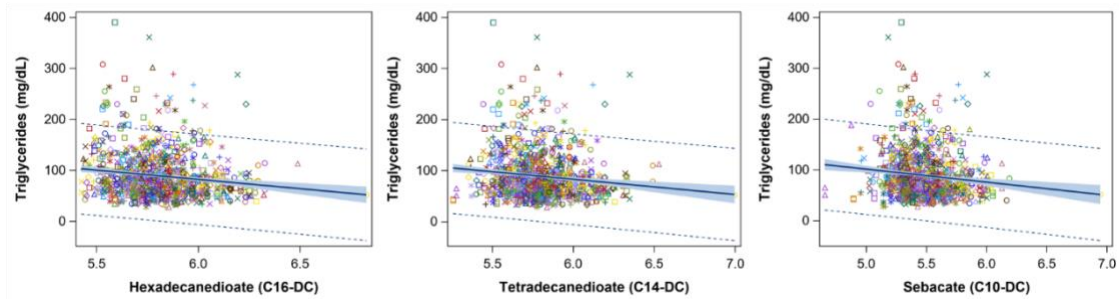

**B. Mono- and diacylglycerols:**

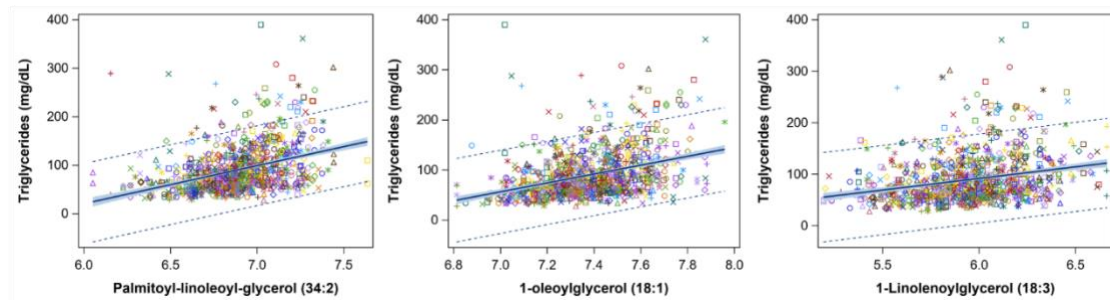

**C. Phospholipids**

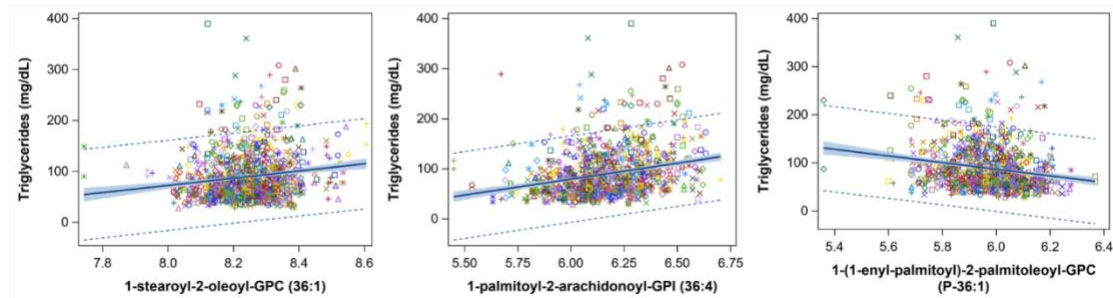

**Figure S1.** Scatter plots with regression lines showing associations between plasma metabolites in childhood (selected from Table 4) with triglycerides across childhood and adolescence. All associations were below the Bonferroni-adjusted threshold of  $p < 0.00028$ . Each unique marker represents an individual participant. Two metabolites from Table 4 are not shown in this figure: hexadecanedioate (a dicarboxylated fatty acid) and lactosyl-N-behenoyl-sphingosine (a lactosylceramide).

**Table S1.** Means and standard deviations for the cardiometabolic measures of interest at each visit in childhood and adolescence.

| Cardiometabolic Measure         | Childhood Visit (~10 years): |              | Adolescent Visit (~16 years) |              | Childhood vs. Adolescence |
|---------------------------------|------------------------------|--------------|------------------------------|--------------|---------------------------|
|                                 | N                            | Mean (SD)    | N                            | Mean (SD)    | P-difference <sup>a</sup> |
| Glucose (mg/dL)                 | 598                          | 81.9 (12.9)  | 410                          | 90.7 (23.4)  | <0.001                    |
| Insulin (μIU/mL)                | 596                          | 11.0 (8.1)   | 409                          | 16.9 (11.3)  | <0.001                    |
| HOMA-IR                         | 596                          | 2.2 (1.7)    | 409                          | 4.0 (4.7)    | <0.001                    |
| HDL-Cholesterol (mg/dL)         | 592                          | 49.8 (11.6)  | 410                          | 45.9 (9.7)   | <0.001                    |
| Triglycerides (mg/dL)           | 598                          | 89.9 (44.2)  | 410                          | 87.5 (47.6)  | 0.417                     |
| Systolic blood pressure (mm Hg) | 599                          | 103.0 (10.0) | 410                          | 115.8 (10.8) | <0.001                    |

<sup>a</sup> P-values were calculated using Student's t-test to assess differences in cardiometabolic measures between childhood and adolescence.

**Table S2.** Prospective associations between all 180 metabolites associated with sugar sweetened beverage intake in childhood (from step 2) and fasting triglycerides across childhood and adolescence.

| Metabolite <sup>a</sup>            | Pathway    | $\beta$ (95% CI) <sup>b</sup> | P-value <sup>c</sup> |
|------------------------------------|------------|-------------------------------|----------------------|
| beta-citrylglutamate               | Amino Acid | -16.8 (-28.5, -5.1)           | 0.00505              |
| carboxyethyl-GABA                  | Amino Acid | -22.2 (-47.6, 3.1)            | 0.08539              |
| N-acetyl-aspartyl-glutamate (NAAG) | Amino Acid | -20 (-37, -2.9)               | 0.02172              |
| N-acetylglutamate                  | Amino Acid | 24 (1.2, 46.8)                | 0.03912              |
| pyroglutamine*                     | Amino Acid | -1.1 (-16.3, 14.1)            | 0.88630              |
| cys-gly, oxidized                  | Amino Acid | -12.5 (-23, -2)               | 0.01979              |
| betaine                            | Amino Acid | -66.2 (-103.6, -28.8)         | 0.00055              |
| dimethylglycine                    | Amino Acid | -3.7 (-31.7, 24.3)            | 0.79577              |
| sarcosine                          | Amino Acid | -32.9 (-53.7, -12.1)          | 0.00199              |
| threonine                          | Amino Acid | -0.0 (-33.8, 33.7)            | 0.99865              |
| 3-methylhistidine                  | Amino Acid | -1.4 (-7.2, 4.3)              | 0.62219              |
| N-acetylhistidine                  | Amino Acid | -17.9 (-36.5, 0.7)            | 0.05879              |
| trans-uocanate                     | Amino Acid | -7.4 (-20.7, 5.9)             | 0.27298              |
| 2,3-dihydroxy-2-methylbutyrate     | Amino Acid | 15.5 (-1.7, 32.6)             | 0.07685              |
| 3-hydroxy-2-ethylpropionate        | Amino Acid | -31.4 (-58, -4.7)             | 0.02111              |
| 3-hydroxyisobutyrate               | Amino Acid | -28.2 (-45.3, -11.2)          | 0.00124              |
| 3-methyl-2-oxobutyrate             | Amino Acid | -1.6 (-6.3, 3.2)              | 0.52423              |
| 3-methylglutaconate                | Amino Acid | -39.1 (-60.2, -18)            | 0.00031              |
| alpha-hydroxyisocaproate           | Amino Acid | -8.8 (-31.8, 14.3)            | 0.45462              |
| isoleucine                         | Amino Acid | 51.8 (8.5, 95)                | 0.01906              |
| isovaleryl carnitine (C5)          | Amino Acid | 8.2 (-9.7, 26.1)              | 0.37012              |
| isovaleryl glycine                 | Amino Acid | 4.3 (-10.5, 19.1)             | 0.56490              |
| 5-(galactosylhydroxy)-L-lysine     | Amino Acid | 5.5 (-16.9, 28)               | 0.62821              |
| 5-hydroxylysine                    | Amino Acid | 2.5 (-14.8, 19.8)             | 0.77356              |
| glutaryl carnitine (C5-DC)         | Amino Acid | -1.4 (-19.6, 16.8)            | 0.87923              |
| N,N,N-trimethyl-5-aminovalerate    | Amino Acid | 7.5 (-14.7, 29.7)             | 0.50567              |
| N6-acetyllysine                    | Amino Acid | -38.6 (-80.3, 3)              | 0.06900              |
| cysteine s-sulfate                 | Amino Acid | -12.1 (-24.6, 0.3)            | 0.05647              |
| methionine sulfone                 | Amino Acid | -7.8 (-28.1, 12.6)            | 0.45224              |
| taurine                            | Amino Acid | -1 (-18.3, 16.2)              | 0.90528              |
| (N(1) + N(8))-acetylspermidine     | Amino Acid | -42.2 (-64.8, -19.6)          | 0.00028              |
| 4-acetamidobutanoate               | Amino Acid | -16.7 (-36.8, 3.5)            | 0.10512              |

|                                                  |                    |                      |         |
|--------------------------------------------------|--------------------|----------------------|---------|
| indoleacetate                                    | Amino Acid         | -0.8 (-22, 20.4)     | 0.94115 |
| indolepropionate                                 | Amino Acid         | 2.2 (-6.5, 10.9)     | 0.62073 |
| tryptophan betaine                               | Amino Acid         | -8.8 (-14.8, -2.8)   | 0.00441 |
| 3-methoxytyrosine                                | Amino Acid         | -42.8 (-69.4, -16.2) | 0.00169 |
| N-acetyltyrosine                                 | Amino Acid         | 10.8 (-8, 29.6)      | 0.25857 |
| p-cresol glucuronide*                            | Amino Acid         | -3.4 (-10.5, 3.6)    | 0.34078 |
| phenol sulfate                                   | Amino Acid         | 8.2 (-6.3, 22.8)     | 0.26738 |
| thyroxine                                        | Amino Acid         | -33.7 (-64.9, -2.5)  | 0.03425 |
| tyramine O-sulfate                               | Amino Acid         | 3.7 (-3.2, 10.5)     | 0.29463 |
| argininate*                                      | Amino Acid         | 11.1 (-2.1, 24.3)    | 0.10016 |
| N-acetylarginine                                 | Amino Acid         | 4 (-15.9, 23.9)      | 0.69309 |
| N-methylproline                                  | Amino Acid         | -2.2 (-9.2, 4.7)     | 0.52751 |
| N-acetylglucosamine/N-acetylgalactosamine        | Carbohydrate       | 15.2 (-8.1, 38.5)    | 0.20066 |
| mannitol/sorbitol                                | Carbohydrate       | -4.9 (-16.6, 6.7)    | 0.40386 |
| arabitol/xylitol                                 | Carbohydrate       | 23.7 (-6.5, 54)      | 0.12383 |
| arabonate/xylonate                               | Carbohydrate       | 2.8 (-18.1, 23.7)    | 0.79271 |
| ribonate                                         | Carbohydrate       | 0.2 (-21.7, 22.1)    | 0.98686 |
| ribulonate/xylulonate*                           | Carbohydrate       | -7.9 (-25.5, 9.7)    | 0.37812 |
| gulonate*                                        | Cofactors/Vitamins | 7.7 (-15, 30.3)      | 0.50501 |
| threonate                                        | Cofactors/Vitamins | -11.2 (-29.4, 7)     | 0.22737 |
| 1-methylnicotinamide                             | Cofactors/Vitamins | -24.4 (-38.7, -10.1) | 0.00088 |
| quinolinate                                      | Cofactors/Vitamins | 2.4 (-13, 17.8)      | 0.75954 |
| trigonelline (N'-methylnicotinate)               | Cofactors/Vitamins | 4.9 (-4, 13.7)       | 0.28104 |
| pantothenate                                     | Cofactors/Vitamins | -13 (-35.4, 9.4)     | 0.25341 |
| beta-cryptoxanthin                               | Cofactors/Vitamins | -11.9 (-19.4, -4.5)  | 0.00178 |
| carotene diol (2)                                | Cofactors/Vitamins | -10.2 (-23.6, 3.2)   | 0.13653 |
| retinol (Vitamin A)                              | Cofactors/Vitamins | 28.1 (2.6, 53.6)     | 0.03110 |
| pyridoxate                                       | Cofactors/Vitamins | -15.1 (-28.7, -1.4)  | 0.03058 |
| deoxycarnitine                                   | Lipid              | -56 (-89.9, -22)     | 0.00131 |
| ceramide (d18:1/14:0, d16:1/16:0)*               | Lipid              | 9.5 (-7.2, 26.1)     | 0.26421 |
| N-stearoyl-sphingadienine (d18:2/18:0)*          | Lipid              | 32.4 (14.7, 50)      | 0.00034 |
| palmitoyl-arachidonoyl-glycerol (16:0/20:4) [2]* | Lipid              | 55.8 (44.1, 67.4)    | 0.00000 |
| palmitoyl-linoleoyl-glycerol (16:0/18:2) [1]*    | Lipid              | 78.3 (66.3, 90.2)    | 0.00000 |
| stearoyl-arachidonoyl-glycerol (18:0/20:4) [1]*  | Lipid              | 39.8 (19.7, 59.9)    | 0.00011 |
| N-oleoylserine                                   | Lipid              | -14.5 (-37.1, 8)     | 0.20583 |
| adipoylcarnitine (C6-DC)                         | Lipid              | -22.3 (-34.8, -9.8)  | 0.00051 |

|                                                        |       |                      |         |
|--------------------------------------------------------|-------|----------------------|---------|
| laurylcarnitine (C12)                                  | Lipid | -50.6 (-66.1, -35)   | 0.00000 |
| linolenoylcarnitine (C18:3)*                           | Lipid | -14.7 (-30.3, 0.8)   | 0.06307 |
| 3-hydroxybutyrylglycine**                              | Lipid | -16.8 (-29.6, -4.1)  | 0.00989 |
| N-palmitoylglycine                                     | Lipid | -33.5 (-62.3, -4.7)  | 0.02266 |
| hexadecanedioate (C16-DC)                              | Lipid | -40 (-56.7, -23.2)   | 0.00000 |
| hexadecenedioate (C16:1-DC)*                           | Lipid | -30.9 (-46.3, -15.6) | 0.00008 |
| octadecadienedioate (C18:2-DC)*                        | Lipid | -15.5 (-26, -5)      | 0.00404 |
| sebacate (C10-DC)                                      | Lipid | -31.6 (-45.4, -17.8) | 0.00001 |
| tetradecanedioate (C14-DC)                             | Lipid | -35.9 (-51.2, -20.5) | 0.00001 |
| 12,13-DiHOME                                           | Lipid | -32.6 (-50, -15.1)   | 0.00028 |
| 2-hydroxylaurate                                       | Lipid | -35.3 (-60.7, -9.8)  | 0.00670 |
| 2-hydroxynervonate*                                    | Lipid | -44.1 (-69.1, -19)   | 0.00061 |
| glycosyl ceramide (d18:1/20:0, d16:1/22:0)*            | Lipid | -18.4 (-44.2, 7.5)   | 0.16329 |
| glycosyl-N-stearoyl-sphingosine (d18:1/18:0)           | Lipid | -11.4 (-39.7, 16.8)  | 0.42573 |
| lactosyl-N-behenoyl-sphingosine (d18:1/22:0)*          | Lipid | -39.6 (-55.4, -23.8) | 0.00000 |
| arachidate (20:0)                                      | Lipid | -41.3 (-64, -18.7)   | 0.00037 |
| margarate (17:0)                                       | Lipid | -22.3 (-44.3, -0.4)  | 0.04645 |
| 1-linoleoyl-GPG (18:2)*                                | Lipid | 38.7 (17.9, 59.5)    | 0.00029 |
| 1-arachidonoylglycerol (20:4)                          | Lipid | 23.4 (9.8, 37)       | 0.00081 |
| 1-linolenoylglycerol (18:3)                            | Lipid | 46.6 (35.6, 57.6)    | 0.00000 |
| 1-oleoylglycerol (18:1)                                | Lipid | 88.3 (73.9, 102.7)   | 0.00000 |
| 2-arachidonoylglycerol (20:4)                          | Lipid | 16.8 (4.2, 29.5)     | 0.00907 |
| 1,2-dipalmitoyl-GPC (16:0/16:0)                        | Lipid | -38 (-80.2, 4.2)     | 0.07746 |
| 1-myristoyl-2-arachidonoyl-GPC (14:0/20:4)*            | Lipid | 47.8 (33.6, 62.1)    | 0.00000 |
| 1-stearoyl-2-oleoyl-GPC (18:0/18:1)                    | Lipid | 76.1 (47.7, 104.5)   | 0.00000 |
| 1-palmitoyl-2-arachidonoyl-GPI (16:0/20:4)*            | Lipid | 71.6 (56.6, 86.6)    | 0.00000 |
| 1-(1-enyl-palmitoyl)-2-arachidonoyl-GPC (P-16:0/20:4)* | Lipid | -55.1 (-79.6, -30.5) | 0.00001 |
| 1-(1-enyl-palmitoyl)-2-palmitoleoyl-GPC (P-16:0/16:1)* | Lipid | -69.3 (-92.8, -45.7) | 0.00000 |
| adrenate (22:4n6)                                      | Lipid | -4.3 (-25.9, 17.3)   | 0.69417 |
| glycochenodeoxycholate                                 | Lipid | 0.6 (-6.8, 8.1)      | 0.86952 |
| taurocholate                                           | Lipid | -3.1 (-10.5, 4.4)    | 0.41791 |
| glycolithocholate sulfate*                             | Lipid | -8.9 (-17.1, -0.7)   | 0.03426 |
| lithocholate sulfate (1)                               | Lipid | -5.8 (-13, 1.4)      | 0.11607 |
| sphinganine-1-phosphate                                | Lipid | -6 (-17.8, 5.8)      | 0.31950 |
| sphingomyelin (43:1)*                                  | Lipid | -24.1 (-44.4, -3.8)  | 0.01989 |
| sphingomyelin (d42:4)*                                 | Lipid | -21.7 (-50.1, 6.7)   | 0.13457 |

|                                                |             |                      |         |
|------------------------------------------------|-------------|----------------------|---------|
| 7-alpha-hydroxy-3-oxo-4-cholestenoate (7-Hoca) | Lipid       | -12.2 (-40.5, 16)    | 0.39506 |
| allantoin                                      | Nucleotide  | 18 (-2.4, 38.4)      | 0.08340 |
| adenine                                        | Nucleotide  | 14.1 (-7.5, 35.6)    | 0.20015 |
| guanosine                                      | Nucleotide  | -1.1 (-6.9, 4.7)     | 0.70714 |
| N2,N2-dimethylguanosine                        | Nucleotide  | -17.3 (-57, 22.3)    | 0.39064 |
| orotate                                        | Nucleotide  | -20.3 (-38.9, -1.7)  | 0.03290 |
| orotidine                                      | Nucleotide  | 9.7 (-13.7, 33.1)    | 0.41465 |
| 3-aminoisobutyrate                             | Nucleotide  | -46.5 (-61.1, -31.8) | 0.00000 |
| 5,6-dihydrothymine                             | Nucleotide  | -41.8 (-70.1, -13.5) | 0.00394 |
| leucylalanine                                  | Peptide     | 8.5 (0.3, 16.6)      | 0.04135 |
| gamma-glutamylcitrulline*                      | Peptide     | -9.4 (-21.8, 3)      | 0.13775 |
| 3-methoxycatechol sulfate (1)                  | Xenobiotics | 3.4 (-3.8, 10.7)     | 0.35382 |
| 3-phenylpropionate (hydrocinnamate)            | Xenobiotics | -4 (-11.9, 3.8)      | 0.31473 |
| 4-ethylphenylsulfate                           | Xenobiotics | -6.9 (-13.2, -0.6)   | 0.03297 |
| 4-hydroxyhippurate                             | Xenobiotics | 3.2 (-9, 15.5)       | 0.60509 |
| 4-methylguaiacol sulfate                       | Xenobiotics | -4.7 (-13.3, 3.9)    | 0.28515 |
| methyl-4-hydroxybenzoate sulfate               | Xenobiotics | 2.4 (-2.2, 7)        | 0.30293 |
| 2-naphthol sulfate                             | Xenobiotics | 6.6 (-2.1, 15.3)     | 0.13589 |
| 3-hydroxypyridine sulfate                      | Xenobiotics | -1.6 (-10.9, 7.6)    | 0.72996 |
| perfluorooctanoate (PFOA)*                     | Xenobiotics | -23.8 (-41.6, -6)    | 0.00873 |
| sulfate*                                       | Xenobiotics | -50.3 (-89.2, -11.4) | 0.01133 |
| hydroquinone sulfate                           | Xenobiotics | 4.3 (-5.8, 14.4)     | 0.40026 |
| 2,3-dihydroxyisovalerate                       | Xenobiotics | 8.6 (-0.7, 17.8)     | 0.06991 |
| 2-isopropylmalate                              | Xenobiotics | 4.1 (-6.1, 14.3)     | 0.42778 |
| 2-piperidinone                                 | Xenobiotics | 2.2 (-5.1, 9.5)      | 0.55747 |
| 3,4-methyleneheptanoate                        | Xenobiotics | -22.8 (-33.9, -11.8) | 0.00006 |
| ergothioneine                                  | Xenobiotics | -6 (-17.1, 5.2)      | 0.29326 |
| erythritol                                     | Xenobiotics | 14 (-6.1, 34.1)      | 0.17062 |

<sup>a</sup>This table only shows metabolites that were identified. A total of 44 unknown metabolites are not shown.

<sup>b</sup>Estimates based on linear mixed effects models adjusted for participant age across visits, sex, and race/ethnicity (Hispanic, non-Hispanic white, non-Hispanic black, or non-Hispanic other). All models included a participant-specific random intercept.

<sup>c</sup>Displaying raw p-values from linear mixed effects models.

\* Indicates tier 2 identification in which no commercially available authentic standard can be found; however, it was annotated based on accurate mass, spectral, and chromatographic similarity to tier 1 identified compounds.

**Table S3.** Sensitivity Analysis – Prospective associations between select metabolites associated with sugar sweetened beverage intake in childhood and triglycerides across childhood and adolescence *with additional adjustment for pubertal stage*.

| Metabolite <sup>a</sup>                                | Pathway | Sub-Pathway               | $\beta$ (95% CI) <sup>b</sup> | P-value <sup>c</sup>   |
|--------------------------------------------------------|---------|---------------------------|-------------------------------|------------------------|
| palmitoyl-linoleoyl-glycerol (16:0/18:2)*              | Lipid   | Diacylglycerol            | 77.0 (65.0, 89.0)             | $<1.00 \times 10^{-7}$ |
| hexadecenedioate (C16:1-DC)*                           | Lipid   | Fatty Acid, Dicarboxylate | -31.6 (-46.8, -16.3)          | $5.66 \times 10^{-5}$  |
| tetradecanedioate (C14-DC)                             | Lipid   | Fatty Acid, Dicarboxylate | -35.4 (-50.7, -20.0)          | $7.72 \times 10^{-6}$  |
| lactosyl-N-behenoyl-sphingosine (d18:1/22:0)*          | Lipid   | Lactosylceramides (LCER)  | -38.2 (-54.0, -22.4)          | $2.79 \times 10^{-6}$  |
| 1-oleoylglycerol (18:1)                                | Lipid   | Monoacylglycerol          | 87.2 (72.7, 101.7)            | $<1.00 \times 10^{-7}$ |
| 1-linolenoylglycerol (18:3)                            | Lipid   | Monoacylglycerol          | 45.9 (34.9, 57.0)             | $<1.00 \times 10^{-7}$ |
| 1-stearoyl-2-oleoyl-GPC (18:0/18:1)                    | Lipid   | Phosphatidylcholine (PC)  | 76.8 (48.5, 105.2)            | $1.63 \times 10^{-7}$  |
| 1-palmitoyl-2-arachidonoyl-GPI (16:0/20:4)*            | Lipid   | Phosphatidylinositol (PI) | 70.7 (55.7, 85.8)             | $<1.00 \times 10^{-7}$ |
| 1-(1-enyl-palmitoyl)-2-palmitoleoyl-GPC (P-16:0/16:1)* | Lipid   | Plasmalogen               | -69.8 (-93.3, -46.3)          | $<1.00 \times 10^{-7}$ |

<sup>a</sup> This table only shows metabolites that were identified. A total of 2 unknown metabolites are not shown.

<sup>b</sup> Estimates based on linear mixed effects models adjusted for participant age across visits, sex, and race/ethnicity (Hispanic, non-Hispanic white, non-Hispanic black, non-Hispanic other), and pubertal stage across visits (pre-pubertal, pubertal, late-pubertal). All models included a participant-specific random intercept.

<sup>c</sup> Displaying raw p-values from linear mixed effects models. Only metabolites with a p-value less than the Bonferroni-corrected  $p < 0.000294$  ( $0.05/170$  metabolite tests or  $2.94 \times 10^{-4}$ ) and with an estimate in the same direction as with SSB intake in childhood are shown.

\* Indicates tier 2 identification in which no commercially available authentic standard can be found; however, it was annotated based on accurate mass, spectral, and chromatographic similarity to tier 1 identified compounds.
